# Supplementary material
Source: publisher site journal article supplement (http://www.degruyter.com/publication/journal_key/FCA/downloadAsset/FCA_Transfer%20of%20Copyright%20Agreement.pdf)
Supplement: Supplementary file 1 [file FCA_Transfer%20of%20Copyright%20Agreement.pdf]

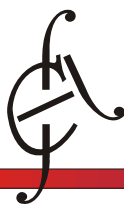

Published by: Institute of Mathematics and Informatics – Bulg. Academy of Sciences, Sofia  
(1998-2010); by Versita, Warsaw and Springer-Verlag, Wien (2011-2014);  
by Walter de Gruyter GmbH, Berlin (since 2015)

## Transfer of Copyright Agreement (TCA)

### 1. This is to verify that the Article:

Title of the Article: .....

.....  
(All) Authors (with underlined name of Corresponding Author):

.....  
Date of Submission: .....

is Author(s) own original work, and has not been/ and will be not/ published elsewhere, in the same or substantially the same form without acknowledging prior publication in the FCAA journal.

2. The Author(s) agree(s) to transfer the Copyright of this Article in FCAA (Fractional Calculus and Applied Analysis) journal, to “Diogenes Co”, via the Managing Editor. The Author(s) hereby grant(s) this journal the license to publish and distribute this article in this journal in any and all forms of actual or future media.

3. The Authors retain the following rights: - all proprietary rights related to the article, other than copyright, such as patent rights; - the right to use the substance of the article in future own works, including lectures and books; - the right to reproduce this article for own purposes, provided the copies are not offered for sale. An Author may self-archive an author-created version of this article on his/her own website or his/her institutional repository. Furthermore, the Author may only post his/her own version provided acknowledgement is given to the original publication in the journal “*Fract. Calc. Appl. Anal.*” (pls. always use this abbreviation to identify the journal in the world databases), Vol. / No. / Year / pp. / DOI, and a link is inserted to the published article on De Gruyter’s website, accompanied by the text: “The original publication is available at .....”.

4. The Corresponding Author warrants that he/she has the full power and authority to enter into this Agreement and to grant the rights granted in this Agreement. All the Authors of this work authorize the Corresponding Author to sign this Agreement on their behalf.

Corresponding Author, Name: .....

Date: .....

Signature: .....

This Copyright Transfer Agreement is essential for publication of this article in FCAA journal, and should be sent (scanned copy by E-mail: [virginia@diogenes.bg](mailto:virginia@diogenes.bg) , or by Fax: +359-2-9478608) to:

---

Managing Editor of FCAA Journal – Virginia Kiryakova  
Institute of Mathematics and Informatics - Bulgarian Academy of Sciences  
‘Acad. G. Bontchev’ Str., Block 8, Sofia 1113 • Bulgaria  
E-mail: [virginia@diogenes.bg](mailto:virginia@diogenes.bg) • [fcaa@math.bas.bg](mailto:fcaa@math.bas.bg) • Fax: +359 2 947 8608
